# Supplementary material
Source: PubMed Central journal article supplement (PMC1560256)
Supplement: rspb20053409s08.pdf [file rspb20053409s08.pdf]

Electronic Appendices

Figure 5

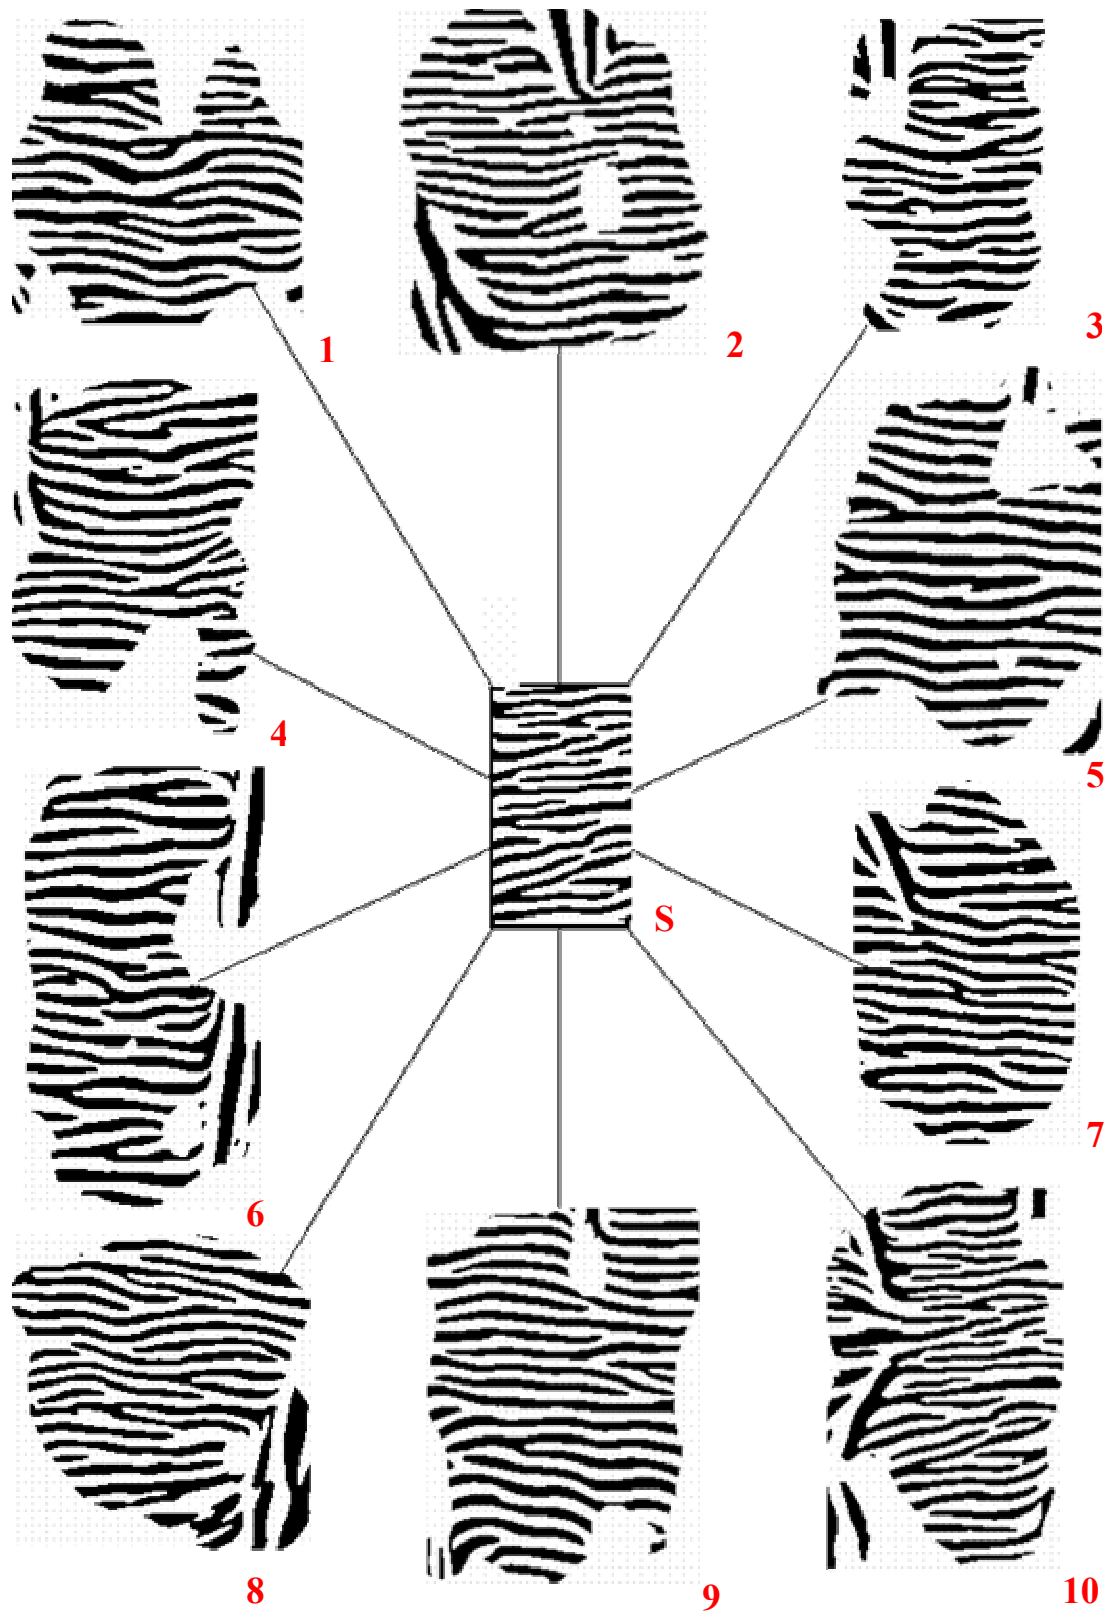

**Fig. 5:** Find the match. The image on the center is a fragment of one of the 10 toothprints around it. The quiz was designed to show that identification might be performed by people without much special training. The answer is on the end of on-line supporting material

**Figure 6**

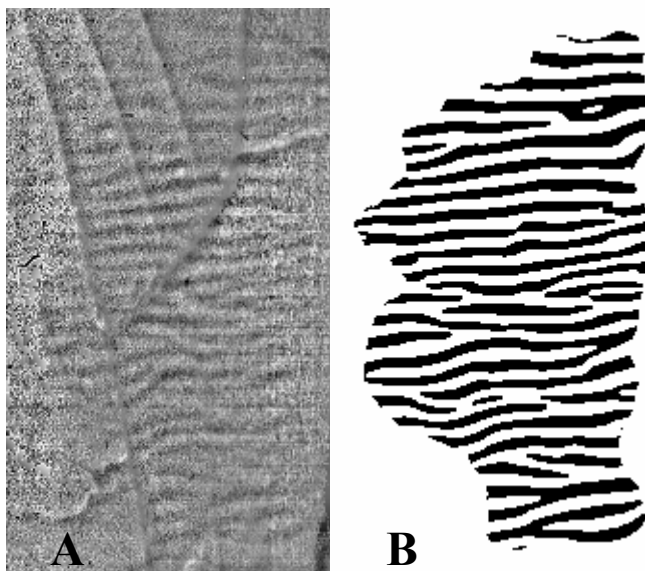

**Fig. 6:** Effect of incineration at 300°C for 1h on toothprint observation. A) Contrast enhancement by the Corel Photo Paint 9 software (Corel Corporation ®). B) Toothprint extracted by the Verifinger Demo 1.4 SDK software (Fingersec®).

Answer to the quiz of figure S1= # 10
